# Supplementary material for: Epitope-Based Multimeric Subunit Vaccine (ATOMSSUISpenta) Confers Cross-Protection Against Streptococcus suis Infection
Source: Research Square preprint supplement (doi:10.21203/rs.3.rs-7215039/v1), 2025-08-25
Supplement: Supplementary file 1 [file 0810adadb232ce9561914b58.docx]

**Supplementary Table 01. Cytotoxic T lymphocyte epitopes (MHC-I) and helper T lymphocyte epitopes (MHC-Il) in the five candidate antigens.**

| **Proteins** | **Allele** | **HLA-I Epitopes (position)** | **HLA-II Epitopes (position)** |
| --- | --- | --- | --- |
| **HP0197** | HLA-A*02:01 | ALWEEFLRI (90-98) |  |
| HLA-A*02:01 | YQIKVENYI (128-136) |  |
| HLA-A*24:02 | DYSYQKALWEEF (84-95) |  |
| HLA-A*24:02 | NYIRQVAEL (134-142) |  |
| **Fnbp** | HLA-A*24:02 | TFDTSEWSF (168-176) |  |
| HLA-A*24:02 | VYFILPNGL (183-191) |  |
| HLA-DRB1*09:01 |  | QEKLRTSVSINLLKA (144-158) |
| HLA-DRB1*09:01 |  | SFNVKHGGVYFILPNGLDLTKI (175-196) |
| HLA-DRB1*09:01 |  | QEKYRFFSSKQGLDN (220-234) |
| HLA-DRB1*09:01 |  | TDTTELTYTLTAKVT (274-288) |
| HLA-DRB1*09:01 |  | MKSFTYTNSKSTEVT (301-315) |
| **Sao** | HLA-A*02:01 | KYIVAKITV (130-138) |  |
| HLA-A*24:02 | KYWYTISEV (110-118) |  |
| HLA-A*24:02 | QLQAMIEFI (144-152) |  |
| HLA-A*24:02 | SVNFSALTF (209-217) |  |
| HLA-A*24:02 | TYTYTVSEV (222-230) |  |
| HLA-A*24:02 | TYENSDQIF (263-271) |  |
| HLA-DRB1*09:01 |  | NNFYTPAPAAASLSI (159-173) |
| **ScpB** | HLA-A*02:01 | GLITLAPCL (691-699) |  |
| HLA-A*02:01 | GLMKNGYYL (733-741) |  |
| HLA-A*24:02 | SFTVTLHNI (662-670) |  |
| HLA-A*24:02 | YYLEGFVRF (739-747) |  |
| HLA-DRB1*09:01 |  | EDIFSFTVTLHNITN (658-672) |
| **SLY** | HLA-A*02:01 | TLDHSGAYV (370-378) |  |
| HLA-A*24:02 | YVAKYNITWEEVSYNEAGEEV (377-397) |  |
| HLA-A*24:02 | VYDKDLPLV (445-453) |  |
| HLA-A*24:02 | LYPQYADEV (465-473) |  |
| HLA-DRB1*09:01 |  | SALTLDHSGAYVAKY (367-381) |

**Supplementary Table 2. Screening of linear/continuous B cell epitopes in the five candidate antigens.**

| **Proteins** | **Linear/continuous Epitopes (position)** | **Score** |
| --- | --- | --- |
| **HP0197** | DYASKMKADDKFFH (104-117) | 0.814 |
| KKYPGDNT (144-151) | 0.716 |
| **Fnbp** | TLEKEKT (323-329) | 0.898 |
| NADYKSGKDQEK (135-146) | 0.798 |
| ASFPTDINDYRNSGQEK (206-222) | 0.731 |
| KVTEPNQQ (286-293) | 0.726 |
| SKQGLNENG (228-237) | 0.724 |
| **Sao** | REANGEELPVLDT (77-89) | 0.801 |
| KNEKGDE (192-198) | 0.779 |
| VLEGRTLNTGEFE (176-188) | 0.777 |
| KITVEDRNGQLQAMIEFIDND (135-155) | 0.76 |
| **ScpB** | TVQNGLITLA (687-696) | 0.835 |
| DVADVGD (749-755) | 0.773 |
| HNITNEDKT (668-676) | 0.758 |
| **Suilysin** | VSYNEAGEEVWEP (388-400) | 0.848 |
| CTGLAWEWWR (434-443) | 0.801 |
